# Supplementary material for: A Review on the Prevalence of Poor Mental Health in the Construction Industry
Source: MDPI journal article supplement (doi:10.3390/healthcare12050570), 2024-02-29
Supplement: s1 [file s1]

**Table S1: Data extraction capturing the burden of poor mental health in construction**

| Author                                   | Country      | Population                                                                     | Sample (n)               | Measurement method                                                   | Mental disorder and/or related                                 | Prevalence                                                                                                                                                                                                                                                      |
|------------------------------------------|--------------|--------------------------------------------------------------------------------|--------------------------|----------------------------------------------------------------------|----------------------------------------------------------------|-----------------------------------------------------------------------------------------------------------------------------------------------------------------------------------------------------------------------------------------------------------------|
| Adhikari et al. (2023) <sup>[33]</sup>   | Nepal        | General construction                                                           | n = 402                  | Depression, Anxiety and Stress Scales, DASS-21 Nepali version        | Anxiety symptoms<br>Depression symptoms<br>Stress              | 19.2 % anxiety symptoms<br>17.1% depression symptoms<br>16.4% high stress                                                                                                                                                                                       |
| Boschman et al. (2013) <sup>[5]</sup>    | Netherlands  | 1. Trade workers (Brick layers)<br>2. Construction professionals (Supervisors) | 1. n = 262<br>2. n = 310 | Whooley Depression Screen Impact Scale<br>Impact of Event Scale, IES | Depression symptoms<br>Psychological distress<br>PTSD symptoms | 1. Trade workers (Brick Layers)<br>- 17.6% depression symptoms<br>- 4.7% psychological distress<br>- 10.9% PTSD symptoms<br>2. Construction professionals (Supervisors)<br>- 19.6% depression symptoms<br>- 6.8% psychological distress<br>- 6.9% PTSD symptoms |
| Bowen et al. (2014) <sup>[53]</sup>      | South Africa | General construction                                                           | n = 676                  | Likert Scale                                                         | Stress                                                         | 33% high stress                                                                                                                                                                                                                                                 |
| Bowers et al. (2018) <sup>[30]</sup>     | Australia    | General construction                                                           | n = 1124                 | Kessler 10                                                           | Psychological distress                                         | 32.5% moderate psychological distress (K10 16-21)<br>21.4% high psychological distress (K10 22-29)<br>6.3% severe psychological distress (K10 30-50)<br>(Moderate to Severe levels 2x Australian population)                                                    |
| Chapman et al. (2020) <sup>[54]</sup>    | Australia    | General construction                                                           | n = 486                  | Kessler 10                                                           | Psychological distress                                         | 22.9% moderate psychological distress (K10 score 16–21)<br>16.1% psychological distress (K10 score 22+)                                                                                                                                                         |
| Dennerlein et al. (2021) <sup>[28]</sup> | USA          | General construction                                                           | n = 259                  | Kessler 6                                                            | Psychological distress                                         | 32% moderate psychological distress (K6 score 5-12)<br>7% severe psychological distress (K6 score ≥ 13)                                                                                                                                                         |
| Dong et al. (2015) <sup>[32]</sup>       | USA          | General construction                                                           | n = 1114                 | ICD-9 diagnosis codes                                                | Depression disorders                                           | 11% depression disorder                                                                                                                                                                                                                                         |
| Dong et al. (2022) <sup>[55]</sup>       | USA          | General construction (male ≥18 years of age)                                   | n = 12034                | Kessler 6<br>Patient Health Questionnaire , PHQ 9                    | Psychological distress<br>Suicide ideation                     | 23.8% moderate psychological distress (K6 score 5–12)<br>5.8% severe psychological distress (K6 score ≥13)<br>2.5% suicide ideation                                                                                                                             |
| Huang et al. (2020) <sup>[36]</sup>      | China        | General construction                                                           | n = 18300                | CES-D                                                                | Depression symptoms                                            | 30% depression symptoms                                                                                                                                                                                                                                         |

|                                               |           |                                                                                                              |                                           |                                                |                                                   |                                                                                                                                                      |
|-----------------------------------------------|-----------|--------------------------------------------------------------------------------------------------------------|-------------------------------------------|------------------------------------------------|---------------------------------------------------|------------------------------------------------------------------------------------------------------------------------------------------------------|
|                                               |           | (manual labourers)                                                                                           |                                           |                                                |                                                   |                                                                                                                                                      |
| Jacobsen et al. (2013) <sup>[6]</sup>         | USA       | General construction                                                                                         | n = 172                                   | Hopkins Symptoms Checklist, HSCL-25 Kessler 6  | Mental distress<br>Psychological distress         | 15.7% Mental distress (HSCL-25 score $\geq 1.50$ )<br>4.7% severe psychological distress (K6 score $\geq 13$ )                                       |
| Kamardeen & Sunindijo (2017) <sup>[35]</sup>  | Australia | General construction                                                                                         | n = 289                                   | Depression, Anxiety and Stress Scales, DASS-21 | Anxiety symptoms<br>Depression symptoms<br>Stress | 36.4 % anxiety symptoms<br>32.5% depression symptoms<br>28.6% high stress                                                                            |
| Lim, S et al (2017) <sup>[7]</sup>            | Korea     | General construction                                                                                         | n = 430                                   | STAI-T<br>CES-D                                | Anxiety symptoms<br>Depression symptoms           | 41.6% anxiety symptoms<br>37.6% depression symptoms                                                                                                  |
| Palaniappan et al. (2022) <sup>[34]</sup>     | Singapore | General construction                                                                                         | n = 348                                   | Depression, Anxiety and Stress Scales, DASS-21 | Anxiety symptoms<br>Depression symptoms<br>Stress | 29% depression symptoms<br>37% anxiety symptoms<br>33% high stress                                                                                   |
| Ross et al. (2022) <sup>[38]</sup>            | Australia | General construction (apprentice)                                                                            | n = 1401                                  | Patient Health Questionnaire , PHQ 9           | Suicide ideation                                  | 29.4% suicide ideation                                                                                                                               |
| Sellenger & Oosthuizen (2017) <sup>[56]</sup> | Australia | General construction (remote workers)                                                                        | n = 113                                   | Kessler 10                                     | Psychological distress                            | 22.9% moderate psychological distress (K10 16-21)<br>17.1% high psychological distress (K10 22-29)<br>8.6% severe psychological distress (K10 30-50) |
| Tyler et al. (2022) <sup>[37]</sup>           | Australia | General construction                                                                                         | n = 1721                                  | Patient Health Questionnaire , PHQ 9           | Suicide ideation                                  | 7.3% suicide ideation                                                                                                                                |
| Wang, C et al. (2017) <sup>[57]</sup>         | Malaysia  | General construction                                                                                         | n = 201                                   | Medical questionnaire                          | Anxiety symptoms<br>Depression symptoms           | 68% anxiety symptoms<br>72% depression symptoms                                                                                                      |
| Wulsin, L et al. (2014) <sup>[31]</sup>       | USA       | General construction:<br>1. General contractors<br>2. Heavy civil contractors<br>3. Specialty subcontractors | 1. n = 1978<br>2. n = 1043<br>3. n = 4408 | ICD-9 diagnosis codes                          | Depression disorders                              | 1. 9.7% depression disorder (GC)<br>2. 7.5% depression disorder (HCC)<br>3. 11.7% depression disorder (SSC)                                          |
| Zhang et al. (2023) <sup>[9]</sup>            | China     | General construction                                                                                         | n = 336                                   | Depression, Anxiety and Stress Scales, DASS-21 | Anxiety symptoms<br>Depression                    | 33.6% anxiety symptoms<br>36.6% depression symptoms<br>14.6% high stress                                                                             |

---

symptoms  
Stress

---
